# Supplementary material
Source: PubMed Central journal article supplement (PMC4733175)
Supplement: JCM.02662-15_zjm999094727so1.pdf [file JCM.02662-15_zjm999094727so1.pdf]

Supplemental Table S1. Molecular epidemiological details of 41 ST22-MRSA-IVh isolates recovered from one ward of a Dublin hospital during a six-week period in 2007<sup>a</sup>

| Isolate number | Date of isolation | Bay | Bed | Source   | Pairs <sup>b</sup>  | CTEs <sup>c</sup> | <i>spa</i> type | <i>dru</i> type | PFGE type | MRSA acquisition |
|----------------|-------------------|-----|-----|----------|---------------------|-------------------|-----------------|-----------------|-----------|------------------|
| M07/0319       | 07/30/2007        | D   | 23  | Patient  | Pair 2              | NA                | t515            | dt10a           | 01042     | OA               |
| M07/0320       | 07/30/2007        | D   | 23  | Mattress | Pair 2              | NA                | t515            | dt10a           | 01042     | NA               |
| M07/0321       | 07/30/2007        | E   | 30  | Mattress | NA                  | NA                | t515            | dt10a           | 01039     | NA               |
| M07/0322       | 08/01/2007        | E   | 18  | Patient  | NA                  | NA                | t032            | dt10j           | 01030     | OA               |
| M07/0323       | 07/31/2007        | C   | 16  | Patient  | NA                  | CTE 1             | t032            | dt10n           | 01024     | OA               |
| M07/0324       | 07/30/2007        | A   | 6   | Patient  | Pair 3              | NA                | t022            | dt10p           | 01039     | OA               |
| M07/0325       | 07/30/2007        | A   | 6   | Mattress | Pair 3              | NA                | t022            | dt10p           | 01039     | NA               |
| M07/0326       | 08/08/2007        | C   | 21  | Patient  | NA                  | NA                | t032            | dt7g            | 01018     | OA               |
| M07/0327       | 08/09/2007        | A   | 6   | Patient  | NA                  | NA                | t515            | dt11j           | 01049     | OA-K             |
| M07/0328       | 08/13/2007        | B   | 15  | Patient  | NA                  | CTE 1             | t032            | dt10n           | 01024     | OA               |
| M07/0329       | 08/13/2007        | E   | 31  | Patient  | Pair 4              | CTE               | t1214           | dt10a           | 01039     | HA               |
| M07/0330       | 08/15/2007        | 5   | SO  | Bedrail  | NA                  | NA                | t032            | dt10a           | 01039     | NA               |
| M07/0331       | 08/15/2007        | E   | 31  | Pillow   | Pair 4              | NA                | t515            | dt10a           | 01063     | NA               |
| M07/0332       | 08/17/2007        | D   | 27  | Patient  | NA                  | NA                | t032            | dt10j           | 01018     | OA-K             |
| M07/0333       | 08/20/2007        | B   | 13  | Patient  | Pair 1 <sup>d</sup> | CTE 1             | t032            | dt10j           | 01024     | HA               |
| M07/0334       | 08/21/2007        | D   | 23  | Mattress | NA                  | CTE 3             | t032            | dt10a           | 01018     | NA               |
| M07/0335       | 08/21/2007        | D   | 23  | Mattress | NA                  | CTE 3             | t032            | dt10a           | 01018     | NA               |
| M07/0336       | 08/21/2007        | D   | 26  | Mattress | NA                  | CTE 3             | t032            | dt10a           | 01018     | NA               |
| M07/0337       | 08/22/2007        | E   | 29  | Bedframe | Pair 1 <sup>d</sup> | NA                | t022            | dt10a           | 01039     | NA               |
| M07/0338       | 08/22/2007        | E   | 30  | Pillow   | NA                  | NA                | t032            | dt10j           | 01146     | NA               |
| M07/0339       | 08/21/2007        | B   | 15  | Patient  | Pair 5              | CTE 2&3           | t032            | dt10n           | 01018     | OA               |
| M07/0340       | 08/22/2007        | B   | 10  | Bedframe | NA                  | CTE 2             | t032            | dt10a           | 01018     | NA               |
| M07/0341       | 08/22/2007        | B   | 11  | Bedframe | NA                  | CTE 2             | t032            | dt10n           | 01018     | NA               |
| M07/0342       | 08/22/2007        | B   | 15  | Pillow   | NA                  | CTE 4             | t032            | dt10a           | 01039     | NA               |
| M07/0343       | 08/22/2007        | B   | 14  | Mattress | NA                  | NA                | t022            | dt10a           | 01039     | NA               |
| M07/0344       | 08/22/2007        | B   | 15  | Mattress | Pair 5              | CTE 4             | t032            | dt10a           | 01039     | NA               |
| M07/0345       | 08/22/2007        | B   | 35  | Mattress | NA                  | NA                | t032            | dt10n           | 01018     | NA               |
| M07/0346       | 08/22/2007        | 2   | SO  | Bedframe | NA                  | NA                | t032            | dt10a           | 01018     | NA               |
| M07/0348       | 08/27/2007        | B   | 14  | Patient  | NA                  | CTE 2&3           | t032            | dt10n           | 01018     | HA               |
| M07/0350       | 08/28/2007        | D   | 27  | Patient  | NA                  | CTE 3             | t032            | dt10a           | 01018     | HA               |
| M07/0351       | 09/03/2007        | A   | 7   | Patient  | NA                  | NA                | t032            | dt10j           | 01024     | OA               |
| M07/0352       | 09/03/2007        | B   | 15  | Patient  | NA                  | CTE 4             | t515            | dt10a           | 01039     | OA               |
| M07/0353       | 09/03/2007        | B   | 15  | Patient  | NA                  | CTE 4             | t1214           | dt10a           | 01039     | OA               |
| M07/0354       | 09/03/2007        | E   | 17  | Patient  | NA                  | NA                | t1214           | dt10a           | 01039     | OA               |
| M07/0355       | 09/03/2007        | E   | 30  | Patient  | NA                  | CTE 5             | t032            | dt10a           | 01042     | OA               |
| M07/0356       | 09/03/2007        | E   | 29  | Patient  | NA                  | NA                | t515            | dt7i            | 01039     | OA               |
| M07/0357       | 09/04/2007        | E   | 33  | Bedframe | NA                  | NA                | t022            | dt10a           | 01039     | NA               |
| M07/0358       | 09/10/2007        | E   | 31  | Patient  | NA                  | CTE 5             | t032            | dt10j           | 01042     | >72 h            |
| M07/0359       | 08/29/2007        | C   | 16  | Patient  | NA                  | NA                | t2951           | dt6e            | 01088     | OA               |
| M07/0415       | 10/04/2007        | A   | 9   | Patient  | NA                  | NA                | t032            | dt10j           | 01024     | HA               |
| M07/0475       | 11/20/2007        | B   | SO  | Air      | NA                  | NA                | t1214           | dt10a           | 01039     | NA               |

<sup>a</sup>Molecular epidemiological data for isolates was determined as part of previous studies (1, 2).

<sup>b</sup>Each pair of isolates included one isolate recovered from a patient and one recovered from their immediate ward environment. Four of the 10 isolates in these pairs were also previously implicated in the cross transmission events (CTEs).

<sup>c</sup>CTEs were previously determined by conventional molecular epidemiological typing.

<sup>d</sup>Isolates associated with pair 1 were recovered from a patient and environmental site in two separate bays. The patient was found to be positive for MRSA while in bay B but was subsequently moved to bay E where the environmental isolate was recovered allowing these two isolates to be classified as a pair.

Abbreviations: SO, single occupancy; NA, not applicable; PFGE, pulsed-field gel electrophoresis; >72 h, the patient's MRSA status was determined 72 h after admission to the ward; OA; the patient was positive for MRSA on admission to the ward; OA-K; the patients' MRSA positive status was known at the time of admission to the ward; HA, hospital-acquired MRSA.

Supplemental Table S2. Comparison of the conventional molecular epidemiological typing data and single-nucleotide variant (SNV) differences identified among isolates within 10 arbitrarily selected pairwise comparisons (PCs)<sup>a</sup> exhibiting  $\leq 40$  SNVs and  $>40$  SNVs

| PCs                       | Compared isolates <sup>b</sup> | Date of isolation | Bay | Bed | Source   | MRSA acquisition | <i>spa</i> type | <i>dru</i> type | PFGE type | No of conventional typing method differences | SNVs |
|---------------------------|--------------------------------|-------------------|-----|-----|----------|------------------|-----------------|-----------------|-----------|----------------------------------------------|------|
| $\leq 40$ SNV differences |                                |                   |     |     |          |                  |                 |                 |           |                                              |      |
| 1                         | M07/0325                       | 07/30/2007        | A   | 6   | mattress | NA               | t022            | dt10p           | 01039     | 3                                            | 0    |
|                           | M07/0328                       | 08/13/2007        | B   | 15  | patient  | OA               | t032            | dt10n           | 01024     |                                              |      |
| 2                         | M07/0326                       | 08/08/2007        | C   | 21  | patient  | OA               | t032            | dt7g            | 01018     | 2                                            | 4    |
|                           | M07/0328                       | 08/13/2007        | B   | 15  | patient  | OA               | t032            | dt10n           | 01024     |                                              |      |
| 3                         | M07/0319                       | 07/30/2007        | D   | 23  | patient  | OA               | t515            | dt10a           | 01042     | 0                                            | 10   |
|                           | M07/0320                       | 07/30/2007        | D   | 23  | mattress | NA               | t515            | dt10a           | 01042     |                                              |      |
| 4                         | M07/0321                       | 07/30/2007        | E   | 30  | mattress | NA               | t515            | dt10a           | 01039     | 1                                            | 1    |
|                           | M07/0329                       | 08/13/2007        | E   | 31  | patient  | HA               | t1214           | dt10a           | 01039     |                                              |      |
| 5                         | M07/0324                       | 07/30/2007        | A   | 6   | patient  | OA               | t022            | dt10p           | 01039     | 3                                            | 15   |
|                           | M07/0336                       | 08/21/2007        | D   | 26  | mattress | NA               | t032            | dt10a           | 01018     |                                              |      |
| 6                         | M07/0355                       | 09/03/2007        | E   | 30  | patient  | OA               | t032            | dt10a           | 01042     | 1                                            | 20   |
|                           | M07/0358                       | 09/10/2007        | E   | 31  | patient  | >72h             | t032            | dt10j           | 01042     |                                              |      |
| 7                         | M07/0337                       | 08/22/2007        | E   | 29  | bedframe | NA               | t022            | dt10a           | 01039     | 0                                            | 27   |
|                           | M07/0359                       | 08/29/2007        | C   | 16  | patient  | OA               | t2951           | dt6e            | 01088     |                                              |      |
| 8                         | M07/0333                       | 08/20/2007        | B   | 13  | patient  | HA               | t032            | dt10j           | 01024     | 2                                            | 33   |
|                           | M07/0342                       | 08/22/2007        | B   | 15  | pillow   | NA               | t032            | dt10a           | 01039     |                                              |      |
| 9                         | M07/0341                       | 08/22/2007        | B   | 11  | bedframe | NA               | t032            | dt10n           | 01018     | 2                                            | 38   |
|                           | M07/0355                       | 09/03/2007        | E   | 30  | patient  | OA               | t032            | dt10a           | 01042     |                                              |      |
| 10                        | M07/0337                       | 08/22/2007        | E   | 29  | bedframe | NA               | t022            | dt10a           | 01039     | 3                                            | 39   |
|                           | M07/0415                       | 10/04/2007        | A   | 9   | patient  | HA               | t032            | dt10j           | 01024     |                                              |      |

| > 40 SNV differences |          |            |   |    |          |      |       |       |       |   |     |
|----------------------|----------|------------|---|----|----------|------|-------|-------|-------|---|-----|
| 1                    | M07/0335 | 08/21/2007 | D | 23 | mattress | NA   | t032  | dt10a | 01018 | 1 | 43  |
|                      | M07/0415 | 10/04/2007 | A | 9  | patient  | HA   | t032  | dt10j | 01024 |   |     |
| 2                    | M07/0319 | 30/07/2007 | D | 23 | patient  | OA   | t515  | dt10a | 01042 | 2 | 54  |
|                      | M07/0475 | 11/20/2007 | B | SO | air      | NA   | t1214 | dt10a | 01039 |   |     |
| 3                    | M07/0328 | 08/13/2007 | B | 15 | patient  | OA   | t032  | dt10n | 01024 | 3 | 63  |
|                      | M07/0337 | 08/22/2007 | E | 29 | bedframe | NA   | t022  | dt10a | 01039 |   |     |
| 4                    | M07/0320 | 07/30/2007 | D | 23 | mattress | NA   | t515  | dt10a | 01042 | 2 | 78  |
|                      | M07/0346 | 08/22/2007 | 2 | SO | bedframe | NA   | t032  | dt10a | 01018 |   |     |
| 5                    | M07/0355 | 09/03/2007 | E | 30 | patient  | OA   | t032  | dt10a | 01042 | 1 | 75  |
|                      | M07/0351 | 09/03/2007 | A | 7  | patient  | OA   | t032  | dt10j | 01024 |   |     |
|                      | M07/0336 | 08/21/2007 | D | 26 | mattress | NA   | t032  | dt10a | 01018 |   |     |
| 6                    | M07/0328 | 08/13/2007 | B | 15 | patient  | OA   | t032  | dt10n | 01024 | 2 | 96  |
|                      | M07/0338 | 08/22/2007 | E | 30 | pillow   | NA   | t032  | dt10j | 01146 |   |     |
| 7                    | M07/0339 | 08/21/2007 | B | 15 | patient  | OA   | t032  | dt10n | 01018 | 3 | 99  |
|                      | M07/0352 | 09/03/2007 | B | 15 | patient  | OA   | t515  | dt10a | 01039 |   |     |
| 8                    | M07/0321 | 07/30/2007 | E | 30 | mattress | NA   | t515  | dt10a | 01039 | 0 | 354 |
|                      | M07/0352 | 09/03/2007 | B | 15 | patient  | OA   | t515  | dt10a | 01039 |   |     |
|                      | M07/0334 | 08/21/2007 | D | 23 | mattress | NA   | t032  | dt10a | 01018 |   |     |
| 9                    | M07/0323 | 07/31/2007 | C | 16 | patient  | NA   | t032  | dt10n | 01024 | 2 | 209 |
|                      | M07/0332 | 08/17/2007 | D | 27 | patient  | OA-K | t032  | dt10j | 01018 |   |     |
| 10                   | M07/0324 | 07/30/2007 | A | 6  | patient  | OA   | t022  | dt10p | 01039 | 3 | 112 |
|                      | M07/0340 | 08/22/2007 | B | 10 | bedframe | NA   | t032  | dt10a | 01018 |   |     |

<sup>a</sup>Pairwise comparisons were randomly selected from those differing by  $\leq 40$  SNV and  $> 40$  SNV for comparison to previously reported conventional molecular epidemiological typing data (1, 2).

Abbreviations: NA, not applicable; PFGE, pulsed-field gel electrophoresis; OA, the patient was positive for MRSA on admission to the ward;  $>72$  h, the patient's MRSA status was determined 72 h after admission to the ward; HA, hospital-acquired MRSA; OA-K, the patients' MRSA positive status was known at the time of admission to the ward

1. **Shore AC, Rossney AS, Kinnevey PM, Brennan OM, Creamer E, Sherlock O, Dolan A, Cunney R, Sullivan DJ, Goering RV, Humphreys H, Coleman DC.** 2010. Enhanced discrimination of highly clonal ST22-methicillin-resistant *Staphylococcus aureus* IV isolates achieved by combining *spa*, *dru*, and pulsed-field gel electrophoresis typing data. J Clin Microbiol **48**:1839-1852.
2. **Creamer E, Shore AC, Rossney AS, Dolan A, Sherlock O, Fitzgerald-Hughes D, Sullivan DJ, Kinnevey PM, O'Lorcain P, Cunney R, Coleman DC, Humphreys H.** 2012. Transmission of endemic ST22-MRSA-IV on four acute hospital wards investigated using a combination of *spa*, *dru* and pulsed-field gel electrophoresis typing. Eur J Clin Microbiol Infect Dis **31**:3151-3161.

# Supplemental Fig. S1

(A)

| Isolate no. | M07/0319 | M07/0320 | M07/0321 | M07/0322 | M07/0323 | M07/0324 | M07/0325 | M07/0326 | M07/0327 | M07/0328 | M07/0329 | M07/0330 | M07/0331 | M07/0332 | M07/0333 | M07/0334 | M07/0335 | M07/0336 | M07/0337 | M07/0338 | M07/0339 | M07/0340 | M07/0341 | M07/0342 | M07/0343 | M07/0344 | M07/0345 | M07/0346 | M07/0348 | M07/0350 | M07/0351 | M07/0352 | M07/0353 | M07/0354 | M07/0355 | M07/0356 | M07/0357 | M07/0358 | M07/0359 | M07/0415 |  |  |
|-------------|----------|----------|----------|----------|----------|----------|----------|----------|----------|----------|----------|----------|----------|----------|----------|----------|----------|----------|----------|----------|----------|----------|----------|----------|----------|----------|----------|----------|----------|----------|----------|----------|----------|----------|----------|----------|----------|----------|----------|----------|--|--|
|             | P        | E        | E        | P        | P        | P        | E        | P        | P        | P        | P        | P        | E        | P        | P        | P        | E        | E        | E        | E        | P        | E        | E        | E        | E        | P        | P        | P        | P        | P        | P        | P        | P        | P        | P        | E        | P        | P        | P        |          |  |  |
| M07/0319    | P        |          |          |          |          |          |          |          |          |          |          |          |          |          |          |          |          |          |          |          |          |          |          |          |          |          |          |          |          |          |          |          |          |          |          |          |          |          |          |          |  |  |
| M07/0320    | E        | 10       |          |          |          |          |          |          |          |          |          |          |          |          |          |          |          |          |          |          |          |          |          |          |          |          |          |          |          |          |          |          |          |          |          |          |          |          |          |          |  |  |
| M07/0321    | E        | 384      | 374      |          |          |          |          |          |          |          |          |          |          |          |          |          |          |          |          |          |          |          |          |          |          |          |          |          |          |          |          |          |          |          |          |          |          |          |          |          |  |  |
| M07/0322    | P        | 171      | 161      | 213      |          |          |          |          |          |          |          |          |          |          |          |          |          |          |          |          |          |          |          |          |          |          |          |          |          |          |          |          |          |          |          |          |          |          |          |          |  |  |
| M07/0323    | P        | 65       | 55       | 319      | 106      |          |          |          |          |          |          |          |          |          |          |          |          |          |          |          |          |          |          |          |          |          |          |          |          |          |          |          |          |          |          |          |          |          |          |          |  |  |
| M07/0324    | P        | 208      | 198      | 176      | 37       | 143      |          |          |          |          |          |          |          |          |          |          |          |          |          |          |          |          |          |          |          |          |          |          |          |          |          |          |          |          |          |          |          |          |          |          |  |  |
| M07/0325    | E        | 108      | 98       | 276      | 63       | 43       | 100      |          |          |          |          |          |          |          |          |          |          |          |          |          |          |          |          |          |          |          |          |          |          |          |          |          |          |          |          |          |          |          |          |          |  |  |
| M07/0326    | P        | 104      | 94       | 280      | 67       | 39       | 104      | 4        |          |          |          |          |          |          |          |          |          |          |          |          |          |          |          |          |          |          |          |          |          |          |          |          |          |          |          |          |          |          |          |          |  |  |
| M07/0327    | P        | 301      | 291      | 83       | 130      | 236      | 93       | 193      | 197      |          |          |          |          |          |          |          |          |          |          |          |          |          |          |          |          |          |          |          |          |          |          |          |          |          |          |          |          |          |          |          |  |  |
| M07/0328    | P        | 108      | 98       | 276      | 63       | 43       | 100      | 0        | 4        | 193      |          |          |          |          |          |          |          |          |          |          |          |          |          |          |          |          |          |          |          |          |          |          |          |          |          |          |          |          |          |          |  |  |
| M07/0329    | P        | 385      | 375      | 1        | 214      | 320      | 177      | 277      | 281      | 84       | 277      |          |          |          |          |          |          |          |          |          |          |          |          |          |          |          |          |          |          |          |          |          |          |          |          |          |          |          |          |          |  |  |
| M07/0330    | P        | 163      | 153      | 221      | 8        | 98       | 45       | 55       | 59       | 138      | 55       | 222      |          |          |          |          |          |          |          |          |          |          |          |          |          |          |          |          |          |          |          |          |          |          |          |          |          |          |          |          |  |  |
| M07/0331    | E        | 286      | 276      | 98       | 115      | 221      | 78       | 178      | 182      | 15       | 178      | 99       | 123      |          |          |          |          |          |          |          |          |          |          |          |          |          |          |          |          |          |          |          |          |          |          |          |          |          |          |          |  |  |
| M07/0332    | P        | 274      | 264      | 110      | 103      | 209      | 66       | 166      | 170      | 27       | 166      | 111      | 111      | 12       |          |          |          |          |          |          |          |          |          |          |          |          |          |          |          |          |          |          |          |          |          |          |          |          |          |          |  |  |
| M07/0333    | P        | 151      | 141      | 233      | 20       | 86       | 57       | 43       | 47       | 150      | 43       | 234      | 12       | 135      | 123      |          |          |          |          |          |          |          |          |          |          |          |          |          |          |          |          |          |          |          |          |          |          |          |          |          |  |  |
| M07/0334    | P        | 115      | 105      | 269      | 56       | 50       | 93       | 7        | 11       | 186      | 7        | 270      | 48       | 171      | 159      | 36       |          |          |          |          |          |          |          |          |          |          |          |          |          |          |          |          |          |          |          |          |          |          |          |          |  |  |
| M07/0335    | E        | 167      | 157      | 217      | 4        | 102      | 41       | 59       | 63       | 134      | 59       | 218      | 4        | 119      | 107      | 16       | 52       |          |          |          |          |          |          |          |          |          |          |          |          |          |          |          |          |          |          |          |          |          |          |          |  |  |
| M07/0336    | E        | 223      | 213      | 161      | 52       | 158      | 15       | 115      | 119      | 78       | 115      | 162      | 60       | 63       | 51       | 72       | 108      | 56       |          |          |          |          |          |          |          |          |          |          |          |          |          |          |          |          |          |          |          |          |          |          |  |  |
| M07/0337    | E        | 171      | 161      | 213      | 0        | 106      | 37       | 63       | 67       | 130      | 63       | 214      | 8        | 115      | 103      | 20       | 56       | 4        | 52       |          |          |          |          |          |          |          |          |          |          |          |          |          |          |          |          |          |          |          |          |          |  |  |
| M07/0338    | E        | 204      | 194      | 180      | 33       | 139      | 4        | 96       | 100      | 97       | 96       | 181      | 41       | 82       | 70       | 53       | 89       | 37       | 19       | 33       |          |          |          |          |          |          |          |          |          |          |          |          |          |          |          |          |          |          |          |          |  |  |
| M07/0339    | P        | 129      | 119      | 255      | 42       | 64       | 79       | 21       | 25       | 172      | 21       | 256      | 34       | 157      | 145      | 22       | 14       | 38       | 94       | 42       | 75       |          |          |          |          |          |          |          |          |          |          |          |          |          |          |          |          |          |          |          |  |  |
| M07/0340    | E        | 96       | 86       | 288      | 75       | 31       | 112      | 12       | 8        | 205      | 12       | 289      | 67       | 190      | 178      | 55       | 19       | 71       | 127      | 75       | 108      | 33       |          |          |          |          |          |          |          |          |          |          |          |          |          |          |          |          |          |          |  |  |
| M07/0341    | E        | 156      | 146      | 228      | 15       | 91       | 52       | 48       | 52       | 145      | 48       | 229      | 7        | 130      | 118      | 5        | 41       | 11       | 67       | 15       | 48       | 27       | 60       |          |          |          |          |          |          |          |          |          |          |          |          |          |          |          |          |          |  |  |
| M07/0342    | E        | 118      | 108      | 266      | 53       | 53       | 90       | 10       | 14       | 183      | 10       | 267      | 45       | 168      | 156      | 33       | 3        | 49       | 105      | 53       | 86       | 11       | 22       | 38       |          |          |          |          |          |          |          |          |          |          |          |          |          |          |          |          |  |  |
| M07/0343    | E        | 171      | 161      | 213      | 0        | 106      | 37       | 63       | 67       | 130      | 63       | 214      | 8        | 115      | 103      | 20       | 56       | 4        | 52       | 0        | 33       | 42       | 75       | 15       | 53       |          |          |          |          |          |          |          |          |          |          |          |          |          |          |          |  |  |
| M07/0344    | E        | 114      | 104      | 270      | 57       | 49       | 94       | 6        | 10       | 187      | 6        | 271      | 49       | 172      | 160      | 37       | 1        | 53       | 109      | 57       | 90       | 15       | 18       | 42       | 4        | 57       |          |          |          |          |          |          |          |          |          |          |          |          |          |          |  |  |
| M07/0345    | P        | 146      | 136      | 238      | 25       | 81       | 62       | 38       | 42       | 155      | 38       | 239      | 17       | 140      | 128      | 5        | 31       | 21       | 77       | 25       | 58       | 17       | 50       | 10       | 28       | 25       | 32       |          |          |          |          |          |          |          |          |          |          |          |          |          |  |  |
| M07/0346    | P        | 88       | 78       | 296      | 83       | 23       | 120      | 20       | 16       | 213      | 20       | 297      | 75       | 198      | 186      | 63       | 27       | 79       | 135      | 83       | 116      | 41       | 8        | 68       | 30       | 83       | 26       | 58       |          |          |          |          |          |          |          |          |          |          |          |          |  |  |
| M07/0348    | P        | 172      | 162      | 212      | 1        | 107      | 36       | 64       | 68       | 129      | 64       | 213      | 9        | 114      | 102      | 21       | 57       | 5        | 51       | 1        | 32       | 43       | 76       | 16       | 54       | 1        | 58       | 26       | 84       |          |          |          |          |          |          |          |          |          |          |          |  |  |
| M07/0350    | P        | 105      | 95       | 279      | 66       | 40       | 103      | 3        | 1        | 196      | 3        | 280      | 58       | 181      | 169      | 46       | 10       | 62       | 118      | 66       | 99       | 24       | 9        | 51       | 13       | 66       | 9        | 41       | 17       | 67       |          |          |          |          |          |          |          |          |          |          |  |  |
| M07/0351    | P        | 92       | 82       | 292      | 79       | 27       | 116      | 16       | 12       | 209      | 16       | 293      | 71       | 194      | 182      | 59       | 23       | 75       | 131      | 79       | 112      | 37       | 4        | 64       | 26       | 79       | 22       | 54       | 4        | 80       | 13       |          |          |          |          |          |          |          |          |          |  |  |
| M07/0352    | P        | 30       | 20       | 354      | 141      | 35       | 178      | 78       | 74       | 271      | 78       | 355      | 133      | 256      | 244      | 121      | 85       | 137      | 193      | 141      | 174      | 99       | 66       | 126      | 88       | 141      | 84       | 116      | 58       | 142      | 75       | 62       |          |          |          |          |          |          |          |          |  |  |
| M07/0353    | P        | 23       | 13       | 361      | 148      | 42       | 185      | 85       | 81       | 278      | 85       | 362      | 140      | 263      | 251      | 128      | 92       | 144      | 200      | 148      | 181      | 106      | 73       | 133      | 95       | 148      | 91       | 123      | 65       | 149      | 82       | 69       | 7        |          |          |          |          |          |          |          |  |  |
| M07/0354    | P        | 40       | 30       | 344      | 131      | 25       | 168      | 68       | 64       | 261      | 68       | 345      | 123      | 246      | 234      | 111      | 75       | 127      | 183      | 131      | 164      | 89       | 56       | 116      | 78       | 131      | 74       | 106      | 48       | 132      | 65       | 52       | 10       | 17       |          |          |          |          |          |          |  |  |
| M07/0355    | P        | 118      | 108      | 266      | 53       | 53       | 90       | 10       | 14       | 183      | 10       | 267      | 45       | 168      | 156      | 33       | 3        | 49       | 105      | 53       | 86       | 11       | 22       | 38       | 0        | 53       | 4        | 28       | 30       | 54       | 13       | 26       | 88       | 95       | 78       |          |          |          |          |          |  |  |
| M07/0356    | P        | 131      | 121      | 253      | 40       | 66       | 77       | 23       | 27       | 170      | 23       | 254      | 32       | 155      | 143      | 20       | 16       | 36       | 92       | 40       | 73       | 2        | 35       | 25       | 13       | 40       | 17       | 15       | 43       | 41       | 26       | 39       | 101      | 108      | 91       | 13       |          |          |          |          |  |  |
| M07/0357    | E        | 114      | 104      | 270      | 57       | 49       | 94       | 6        | 10       | 187      | 6        | 271      | 49       | 172      | 160      | 37       | 1        | 53       | 109      | 57       | 90       | 15       | 18       | 42       | 4        | 57       | 0        | 32       | 26       | 58       | 9        | 22       | 84       | 91       | 74       | 4        | 17       |          |          |          |  |  |
| M07/0358    | P        | 138      | 128      | 246      | 33       | 73       | 70       | 30       | 34       | 163      | 30       | 247      | 25       | 148      | 136      | 13       | 23       | 29       | 85       | 33       | 66       | 9        | 42       | 18       | 20       | 33       | 24       | 8        | 50       | 34       | 33       | 46       | 108      | 115      | 98       | 20       | 7        | 24       |          |          |  |  |
| M07/0359    | P        | 198      | 188      | 186      | 27       | 133      | 10       | 90       | 94       | 103      | 90       | 187      | 35       | 88       | 76       | 47       | 83       | 31       | 25       | 27       | 6        | 69       | 102      | 42       | 80       | 27       | 84       | 52       | 110      | 26       | 93       | 106      | 168      | 175      | 158      | 80       | 67       | 84       | 60       |          |  |  |
| M07/0415    | P        | 210      | 200      | 174      | 39       | 145      | 2        | 102      | 106      | 91       | 102      | 175      | 47       | 76       | 64       | 59       | 95       | 43       | 13       | 39       | 6        | 81       | 114      | 54       | 92       | 39       | 96       | 64       | 122      | 38       | 105      | 118      | 180      | 187      | 170      | 92       | 79       | 96       | 72       | 12       |  |  |

(B)

| Isolate no. | M07/0319 | M07/0322 | M07/0323 | M07/0324 | M07/0326 | M07/0327 | M07/0328 | M07/0329 | M07/0330 | M07/0332 | M07/0333 | M07/0334 | M07/0339 | M07/0345 | M07/0346 | M07/0348 | M07/0350 | M07/0351 | M07/0352 | M07/0353 | M07/0354 | M07/0355 | M07/0356 | M07/0358 | M07/0359 | M07/0415 | M07/0475 |
|-------------|----------|----------|----------|----------|----------|----------|----------|----------|----------|----------|----------|----------|----------|----------|----------|----------|----------|----------|----------|----------|----------|----------|----------|----------|----------|----------|----------|
| M07/0319    | p        |          |          |          |          |          |          |          |          |          |          |          |          |          |          |          |          |          |          |          |          |          |          |          |          |          |          |
| M07/0322    | p        | 171      |          |          |          |          |          |          |          |          |          |          |          |          |          |          |          |          |          |          |          |          |          |          |          |          |          |
| M07/0323    | p        | 65       | 106      |          |          |          |          |          |          |          |          |          |          |          |          |          |          |          |          |          |          |          |          |          |          |          |          |
| M07/0324    | p        | 208      | 37       | 143      |          |          |          |          |          |          |          |          |          |          |          |          |          |          |          |          |          |          |          |          |          |          |          |
| M07/0326    | p        | 104      | 67       | 39       | 104      |          |          |          |          |          |          |          |          |          |          |          |          |          |          |          |          |          |          |          |          |          |          |
| M07/0327    | p        | 301      | 130      | 236      | 93       | 197      |          |          |          |          |          |          |          |          |          |          |          |          |          |          |          |          |          |          |          |          |          |
| M07/0328    | p        | 108      | 63       | 43       | 100      | 4        | 193      |          |          |          |          |          |          |          |          |          |          |          |          |          |          |          |          |          |          |          |          |
| M07/0329    | p        | 385      | 214      | 320      | 177      | 281      | 84       | 277      |          |          |          |          |          |          |          |          |          |          |          |          |          |          |          |          |          |          |          |
| M07/0330    | p        | 163      | 8        | 98       | 45       | 59       | 138      | 55       | 222      |          |          |          |          |          |          |          |          |          |          |          |          |          |          |          |          |          |          |
| M07/0332    | p        | 274      | 103      | 209      | 66       | 170      | 27       | 166      | 111      | 111      |          |          |          |          |          |          |          |          |          |          |          |          |          |          |          |          |          |
| M07/0333    | p        | 151      | 20       | 86       | 57       | 47       | 150      | 43       | 234      | 12       | 123      |          |          |          |          |          |          |          |          |          |          |          |          |          |          |          |          |
| M07/0334    | p        | 115      | 56       | 50       | 93       | 11       | 186      | 7        | 270      | 48       | 159      | 36       |          |          |          |          |          |          |          |          |          |          |          |          |          |          |          |
| M07/0339    | p        | 129      | 42       | 64       | 79       | 25       | 172      | 21       | 256      | 34       | 145      | 22       | 14       |          |          |          |          |          |          |          |          |          |          |          |          |          |          |
| M07/0345    | p        | 146      | 25       | 81       | 62       | 42       | 155      | 38       | 239      | 17       | 128      | 5        | 31       | 17       |          |          |          |          |          |          |          |          |          |          |          |          |          |
| M07/0346    | p        | 88       | 83       | 23       | 120      | 16       | 213      | 20       | 297      | 75       | 186      | 63       | 27       | 41       | 58       |          |          |          |          |          |          |          |          |          |          |          |          |
| M07/0348    | p        | 172      | 1        | 107      | 36       | 68       | 129      | 64       | 213      | 9        | 102      | 21       | 57       | 43       | 26       | 84       |          |          |          |          |          |          |          |          |          |          |          |
| M07/0350    | p        | 105      | 66       | 40       | 103      | 1        | 196      | 3        | 280      | 58       | 169      | 46       | 10       | 24       | 41       | 17       | 67       |          |          |          |          |          |          |          |          |          |          |
| M07/0351    | p        | 92       | 79       | 27       | 116      | 12       | 209      | 16       | 293      | 71       | 182      | 59       | 23       | 37       | 54       | 4        | 80       | 13       |          |          |          |          |          |          |          |          |          |
| M07/0352    | p        | 30       | 141      | 35       | 178      | 74       | 271      | 78       | 355      | 133      | 244      | 121      | 85       | 99       | 116      | 58       | 142      | 75       | 62       |          |          |          |          |          |          |          |          |
| M07/0353    | p        | 23       | 148      | 42       | 185      | 81       | 278      | 85       | 362      | 140      | 251      | 128      | 92       | 106      | 123      | 65       | 149      | 82       | 69       | 7        |          |          |          |          |          |          |          |
| M07/0354    | p        | 40       | 131      | 25       | 168      | 64       | 261      | 68       | 345      | 123      | 234      | 111      | 75       | 89       | 106      | 48       | 132      | 65       | 52       | 10       | 17       |          |          |          |          |          |          |
| M07/0355    | p        | 118      | 53       | 53       | 90       | 14       | 183      | 10       | 267      | 45       | 156      | 33       | 3        | 11       | 28       | 30       | 54       | 13       | 26       | 88       | 95       | 78       |          |          |          |          |          |
| M07/0356    | p        | 131      | 40       | 66       | 77       | 27       | 170      | 23       | 254      | 32       | 143      | 20       | 16       | 2        | 15       | 43       | 41       | 26       | 39       | 101      | 108      | 91       | 13       |          |          |          |          |
| M07/0358    | p        | 138      | 33       | 73       | 70       | 34       | 163      | 30       | 247      | 25       | 136      | 13       | 23       | 9        | 8        | 50       | 34       | 33       | 46       | 108      | 115      | 98       | 20       | 7        |          |          |          |
| M07/0359    | p        | 198      | 27       | 133      | 10       | 94       | 103      | 90       | 187      | 35       | 76       | 47       | 83       | 69       | 52       | 110      | 26       | 93       | 106      | 168      | 175      | 158      | 80       | 67       | 60       |          |          |
| M07/0415    | p        | 210      | 39       | 145      | 2        | 106      | 91       | 102      | 175      | 47       | 64       | 59       | 95       | 81       | 64       | 122      | 38       | 105      | 118      | 180      | 187      | 170      | 92       | 79       | 72       | 12       |          |
| M07/0475    | p        | 54       | 117      | 11       | 154      | 50       | 247      | 54       | 331      | 109      | 220      | 97       | 61       | 75       | 92       | 34       | 118      | 51       | 38       | 24       | 31       | 14       | 64       | 77       | 84       | 144      | 156      |

(C)

| Isolate no. | M07/0320 | M07/0321 | M07/0325 | M07/0331 | M07/0335 | M07/0336 | M07/0337 | M07/0338 | M07/0340 | M07/0341 | M07/0342 | M07/0343 | M07/0344 | M07/0357 |
|-------------|----------|----------|----------|----------|----------|----------|----------|----------|----------|----------|----------|----------|----------|----------|
| M07/0320    | E        |          |          |          |          |          |          |          |          |          |          |          |          |          |
| M07/0321    | E        | 374      |          |          |          |          |          |          |          |          |          |          |          |          |
| M07/0325    | E        | 98       | 276      |          |          |          |          |          |          |          |          |          |          |          |
| M07/0331    | E        | 276      | 98       | 178      |          |          |          |          |          |          |          |          |          |          |
| M07/0335    | E        | 157      | 217      | 59       | 119      |          |          |          |          |          |          |          |          |          |
| M07/0336    | E        | 213      | 161      | 115      | 63       | 56       |          |          |          |          |          |          |          |          |
| M07/0337    | E        | 161      | 213      | 63       | 115      | 4        | 52       |          |          |          |          |          |          |          |
| M07/0338    | E        | 194      | 180      | 96       | 82       | 37       | 19       | 33       |          |          |          |          |          |          |
| M07/0340    | E        | 86       | 288      | 12       | 190      | 71       | 127      | 75       | 108      |          |          |          |          |          |
| M07/0341    | E        | 146      | 228      | 48       | 130      | 11       | 67       | 15       | 48       | 60       |          |          |          |          |
| M07/0342    | E        | 108      | 266      | 10       | 168      | 49       | 105      | 53       | 86       | 22       | 38       |          |          |          |
| M07/0343    | E        | 161      | 213      | 63       | 115      | 4        | 52       | 0        | 33       | 75       | 15       | 53       |          |          |
| M07/0344    | E        | 104      | 270      | 6        | 172      | 53       | 109      | 57       | 90       | 18       | 42       | 4        | 57       |          |
| M07/0357    | E        | 104      | 270      | 6        | 172      | 53       | 109      | 57       | 90       | 18       | 42       | 4        | 57       | 0        |

Supplemental Fig. S1. Pairwise comparisons of single-nucleotide variant (SNV) differences identified between the 41 ST22-MRSA-IVh isolates based on alignment of all isolate whole-genome sequences to the earliest recovered isolate (M07/0319) with subsequent assignment of isolates exhibiting  $\leq 40$  SNVs as representing a cross-transmission event (CTE). (A) Isolates differing by  $\leq 40$  SNVs where one isolate was recovered from a patient and one was recovered from their immediate ward environment (indicated with grey shading). (B) Isolates differing by  $\leq 40$  SNVs where both isolates were recovered from separate patients (indicated with grey shading). (C) Isolates differing by  $\leq 40$  SNVs where both isolates were recovered from a different environmental source (indicated with grey shading). Abbreviations: Patient, P; Environment, E.
